# Supplementary material
Source: PubMed Central journal article supplement (PMC3199013)

# FIGURE S1

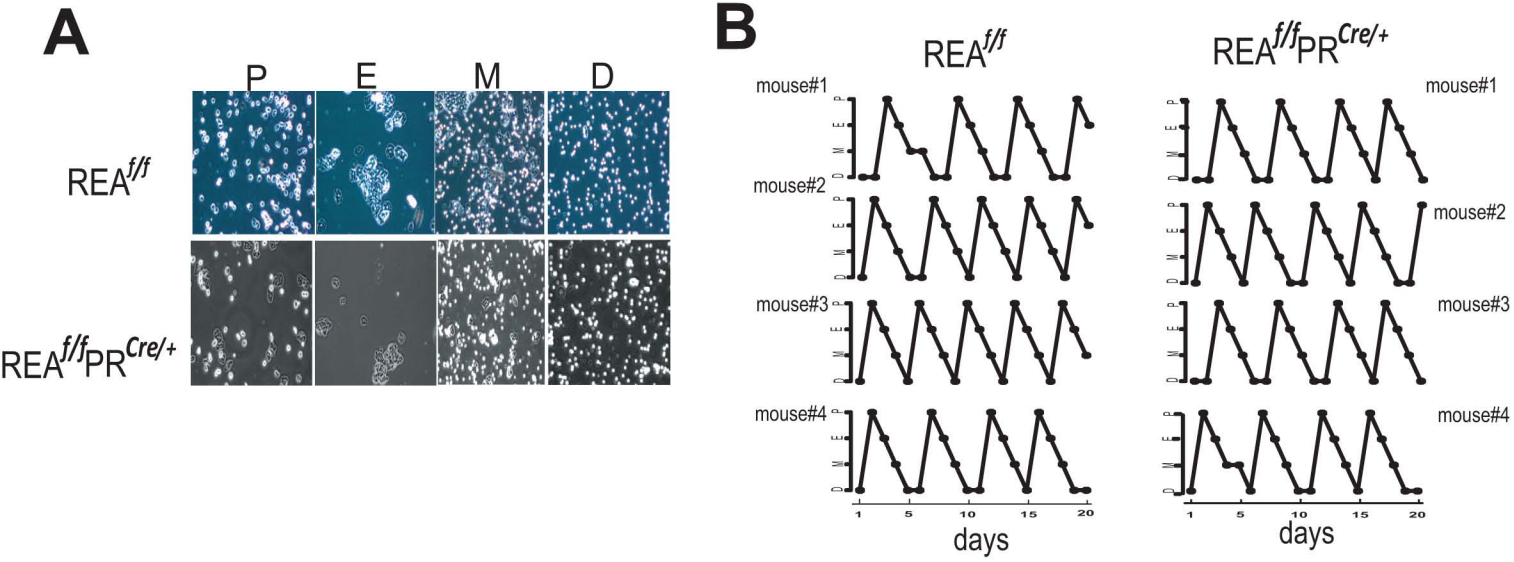

Supplement: supp_en.2011-1100v1_EN-11-1100supFigure_S1.pdf [file supp_en.2011-1100v1_EN-11-1100supFigure_S1.pdf]
